# Supplementary material for: Giant Periodic Pseudomagnetic Fields in Strained Kagome Magnet FeSn Epitaxial Films on SrTiO3(111) Substrate
Source: PubMed Central journal article supplement (PMC10037333; doi:10.1021/acs.nanolett.3c00345), 2023-03-13
Supplement: nl3c00345_si_001.pdf [file nl3c00345_si_001.pdf]

# Supporting Information

## Giant periodic pseudo-magnetic fields in strained kagome magnet FeSn epitaxial films on SrTiO<sub>3</sub>(111) substrate

Huimin Zhang<sup>1,2</sup>, Michael Weinert<sup>3</sup>, and Lian Li<sup>1\*</sup>

<sup>1</sup>Department of Physics and Astronomy, West Virginia University, Morgantown, WV 26506, USA

<sup>2</sup>State Key Laboratory of Structural Analysis, Optimization and CAE Software for Industrial Equipment, Dalian University of Technology, Dalian, 116024, China

<sup>3</sup>Department of Physics, University of Wisconsin, Milwaukee, WI 53201, USA

\*Correspondence to: [lian.li@mail.wvu.edu](mailto:lian.li@mail.wvu.edu)

### **This file includes:**

Note 1: MBE growth of FeSn films on SrTiO<sub>3</sub>(111) substrate

Note 2: Calculations of the pseudo-magnetic field

Note 3: Modulation of electronic properties by stripes revealed by dI/dV maps

Figures S1-S21

### **Note 1: MBE growth of FeSn films on SrTiO<sub>3</sub>(111) substrate**

The FeSn films were grown by molecular beam epitaxy (MBE) on Nb-doped (0.05 wt.%) SrTiO<sub>3</sub>(111) substrates. The SrTiO<sub>3</sub>(111) substrates were first degassed at 600 °C for 3 hours and then followed by annealing at 950 °C for 1 hour to obtain a flat surface with step-terrace morphology. During the MBE growth, high purity Fe (99.995%) and Sn (99.9999%) were evaporated from Knudson cells setting at 1150 °C and 805 °C and co-deposited on the SrTiO<sub>3</sub>(111) substrate at a substrate temperature ( $T_{sub}$ ) between 480 to 530 °C. The Fe/Sn ratio is estimated to be 1:2.7 during growth. The substrate temperature is monitored by a LAND portable infrared thermometer (Cyclops 160L). At  $T_{sub} = 480$  °C, the surface of the film exhibits stripe modulations while at elevated  $T_{sub} = 530$ °C, such modulations are mostly absent, as shown in Figure S3. Multiple samples (> 5) were grown with these parameters.

FeSn consists of alternating Sn<sub>2</sub> honeycomb (Sn termination) and Fe<sub>3</sub>Sn kagome layer (Fe<sub>3</sub>Sn termination) vertically stacked. The stripe modulation only appears on Sn termination, while the Fe<sub>3</sub>Sn termination exhibits the close-packed structure without noticeable distortion (Figure S5). The striped surface shows crest and trough morphology with a height contrast ~20.9 pm (c.f., Figure S10 for bias-dependent behavior). At atomic scale, the valley region (on the stripe) is of slight distortion while the trough region exhibits strong distortion, as shown with the ball-and-stick model imposed on top (Figure 1g).

### **Note 2: Calculations of the pseudo-magnetic field**

In general, the response of Dirac materials, i.e., materials whose low energy excitations are described by massless Dirac equation, to strain is well understood<sup>1</sup>. For a honeycomb lattice, strain induced distortion will lead to axial vector and scalar potentials, which will strongly modify its electronic properties<sup>2</sup>. At the level of tight binding model, the potential will modify the Dirac Hamiltonian:

$$-i\hbar v_F \vec{\sigma} \cdot (\nabla - i\vec{A})$$

where  $A_x = \frac{\sqrt{3}}{2}(t_3 - t_2)$  and  $A_y = \frac{1}{2}(t_2 + t_3 - 2t_1)$ , and  $t_i$  are the nearest neighbor hopping parameters. For a perfect honeycomb lattice, the  $t_i$  are the same, resulting in zero A. For distorted honeycomb, however, the lattice distortion will modify the lattice constant, thus the hopping

parameter, leading to non-zero  $A$ . Furthermore, assuming that the atomic displacements  $u_i$  are small in comparison with the lattice constant, then the hopping parameter can be written as:

$$t_i = t + \frac{\beta t}{a^2} \vec{\delta}_i (\vec{u}_i - \vec{u}_0) \text{ and } (\vec{u}_i - \vec{u}_0) \propto (\vec{\delta}_i \nabla) \vec{u}(\vec{r}) \text{ (}\vec{\delta}_i \text{ is the nearest neighbor vectors).}$$

This leads to an effective magnetic field  $B_{eff} = \nabla \times \vec{A}$ , with

$$A_x = c \frac{\beta t}{a} (u_{xx} - u_{yy}), A_y = -c \frac{2\beta t}{a} u_{xy}$$

This effective field will result in Landau levels (LLs) that are expected to follow the equation, same as the one caused by the application of real electromagnetic fields<sup>3,4</sup>:

$$E_N = E_D + sgn(N) v_F \sqrt{2e\hbar |N| B_{eff}} \quad (1)$$

Here,  $E_D$  is the energy of Dirac point,  $v_F$  is the Fermi velocity,  $e$  is the electron charge  $1.602 \times 10^{-19} \text{ C}$ ,  $\hbar$  is the reduced Planck constant  $1.0546 \times 10^{-34} \text{ J} \cdot \text{s}$ , and  $B_{eff}$  is the pseudo-magnetic field. The integer  $N$  represents an electron-like ( $N > 0$ ) or a hole-like ( $N < 0$ ) LL index.

$$k = \frac{E_N - E_D}{sgn(N) \sqrt{|N|}} \quad (2)$$

The slope  $k$  is obtained from experimental data, as shown in Fig. 4e where  $E_N - E_D$  is plotted as a function of  $sgn(N) \sqrt{|N|}$ . The linear fit in Fig. 4e yields to a slope  $k = 0.2182 \pm 0.006 \text{ eV}$ .

$$B_{eff} = \frac{k^2}{2e\hbar v_F^2} \quad (3)$$

Basing on Equation 3, we can calculate the effective pseudo-magnetic field  $B_{eff}$ . If we take the bulk FeSn value  $v_F = (1.7 \pm 0.2) \times 10^5 \text{ m s}^{-1}$  due to lack of data for epitaxial FeSn films, the pseudo-magnetic field is determined to be  $B_{eff} = 1251 \pm 363 \text{ T}$ . If we take the Fermi velocity of stanene ( $v_F = 4.4 \times 10^5 \text{ m s}^{-1}$ )<sup>5</sup>, the effective pseudo-magnetic field  $B_{eff} = 187 \pm 10 \text{ T}$  is obtained. In addition, the  $dI/dV$  spectra in Sn layer of FeSn (Fig. 3b) are intrinsically different from that of stanene on Au(111)<sup>6</sup> or Sb(111)<sup>7</sup>. Therefore, to adopt the Fermi velocity of FeSn is more appropriate.

The LLs for strain-induced pseudomagnetic field in kagome layer are expected to follow similar equation, however with an anisotropic Fermi velocity<sup>8</sup>.

### **Note 3: Modulation of electronic properties by stripes revealed by dI/dV maps**

The Sn honeycomb with stripe modulations are investigated by dI/dV mapping. The topographic image and its corresponding spatial dI/dV maps are displayed in Fig. S17a. Accompanied the stripes in the topography, we observe stripy electronic modulation across the surface in the dI/dV maps within the energy range [-500 meV, 500 meV]. Figure S17b compares the line profile derived from the topography and corresponding dI/dV maps, where the dashed red lines mark the valley position from the topography. Between the energy ranges [-500 meV, -100 meV] and [100 meV, 300 meV], the valley position in the topography corresponds to higher density of states. At Fermi level  $g(\mathbf{r}, 0 \text{ meV})$ , the modulation is almost gone. At the energy window [400 meV, 500 meV], the valley position in the topography corresponds to lower density of states. In other words, there is a  $\pi$ -phase shift between 400 meV and 500 meV, compared to the other energies.

We notice that there are different stripe orientations for different FeSn islands (Figure S6). dI/dV spectra and dI/dV maps are carried out for stripes with different orientations and we find that the orientation of the stripes has no detectable effect on the dI/dV spectra or maps. As shown in Figure S19, we find that not only the dI/dV spectra but also the spatial modulation is consistent along different orientations.

## Supporting Figures

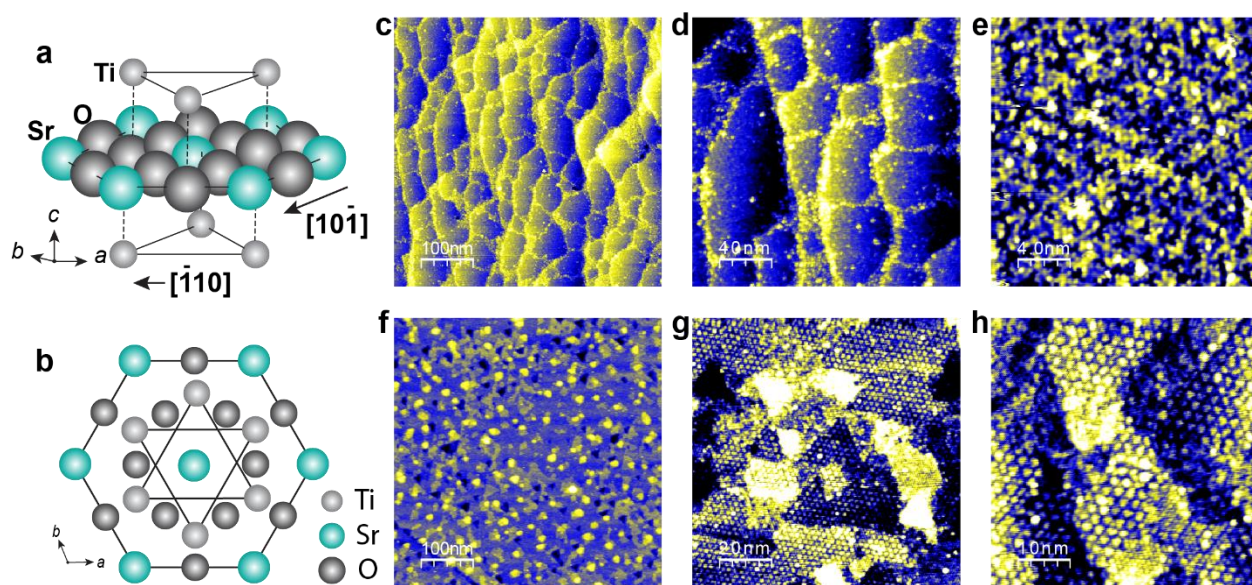

**Figure S1. STM imaging of the annealed SrTiO<sub>3</sub>(111) substrate.** Ball-and-stick model of the SrTiO<sub>3</sub>(111) surface: side view (a) and top-view (b). c-e, Topographic STM images of type-1 SrTiO<sub>3</sub>(111) substrate. Setpoint:  $V = 3.0$  V,  $I = 30$  pA (c)-(d), and  $V = 1.0$  V,  $I = 500$  pA (e). f-h, Topographic STM images of type-2 SrTiO<sub>3</sub>(111) substrate. Setpoint:  $V = 2.0$  V,  $I = 10$  pA for (f)-(g), and  $V = 2.0$  V,  $I = 30$  pA for (h). The SrTiO<sub>3</sub>(111) surface exhibits a  $(4 \times 4)$  reconstruction. The growth of FeSn films is similar on both types of SrTiO<sub>3</sub>(111) substrates.

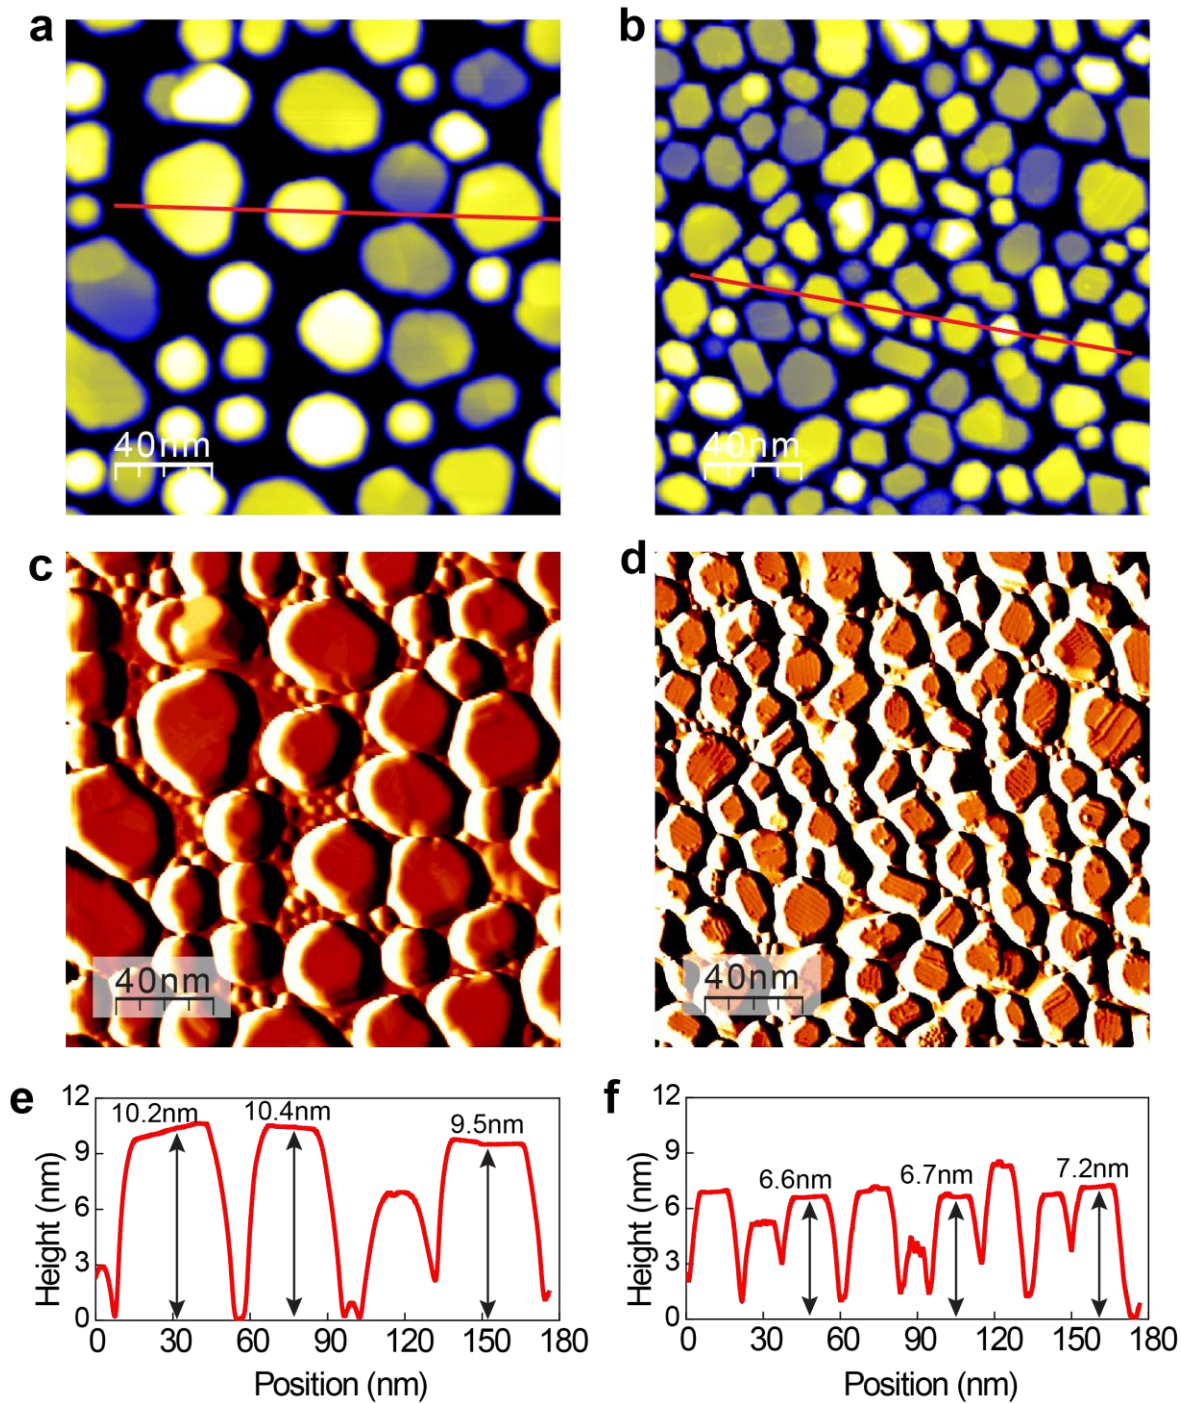

**Figure S2.** Initial stages of FeSn growth on SrTiO<sub>3</sub>(111) substrates. **a-b**, STM topographic images of FeSn/SrTiO<sub>3</sub>(111) films. Setpoint:  $V = 2,0$  V,  $I = 10$  pA. **c-d**, STM images of (a) and (b) in differential mode. **e-f**, Line profiles along the red line in (a) and (b), respectively.

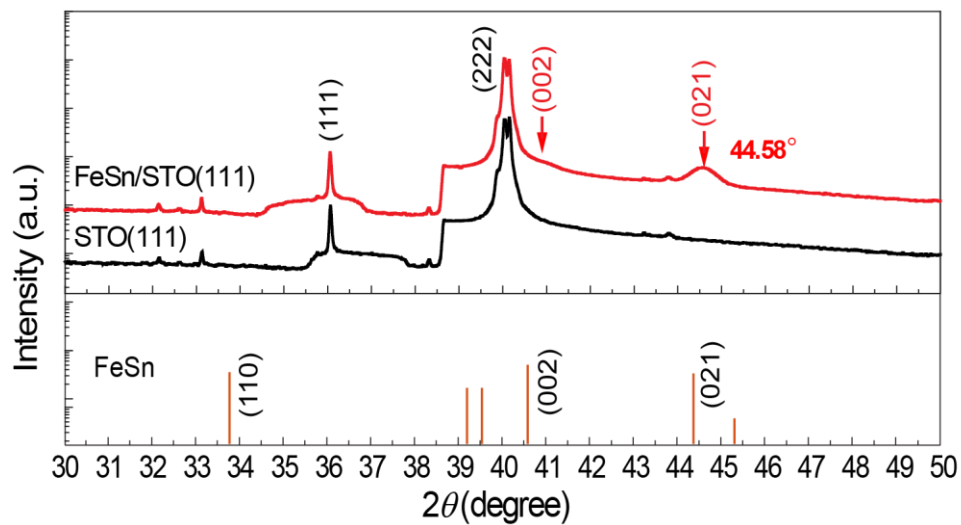

**Figure S3. X-ray diffraction (XRD) data of a 20 nm FeSn/SrTiO<sub>3</sub>(111) film.** The peaks at  $2\theta = 40.52^\circ$  and  $44.58^\circ$  are indexed as FeSn (002) and (021), confirming the FeSn phase. Note that both peaks are slightly shifted to higher values, indicating smaller lattice constant in the  $c$ -direction.

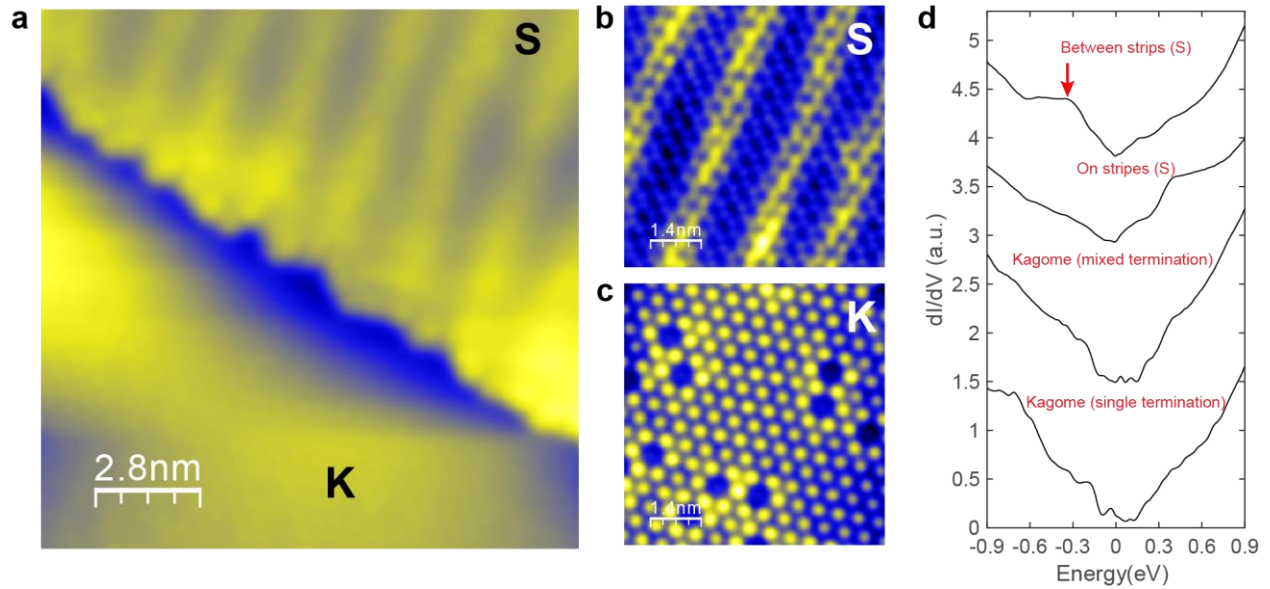

**Figure S4. STM imaging of the mixed Sn termination (S layer) and  $\text{Fe}_3\text{Sn}$  kagome termination (K layer) in  $\text{FeSn}/\text{STO}(111)$  films. a**, Topographic STM image showing both S and K terminations. Setpoint:  $V = 0.9$  V,  $I = 3.0$  nA. **b**, The STM image of the S-layer with stripe modulations. Setpoint:  $V = -0.1$  V,  $I = 3.0$  nA. **c**, STM image of the K-layer without stripe modulations. Setpoint:  $V = 0.2$  V,  $I = 1.0$  nA. **d**, Typical  $dI/dV$  spectra taken between stripes and on stripes on the Sn layer; and on single and mixed K layers.



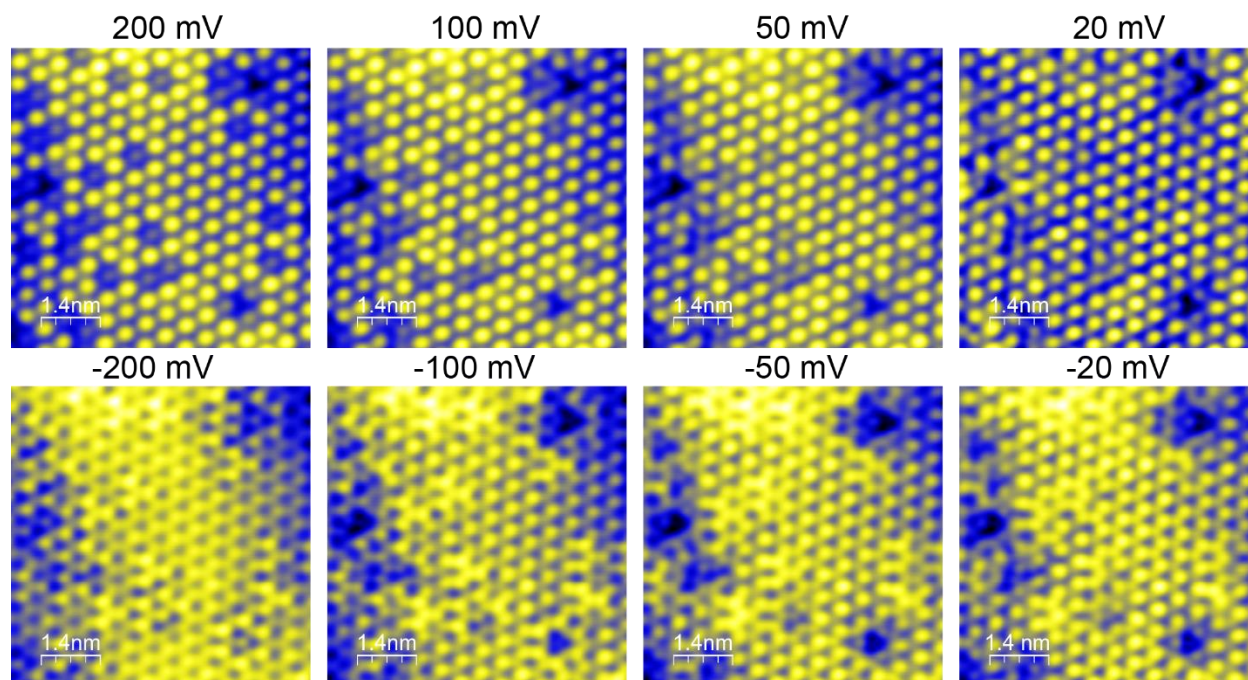

**Figure S5. Bias-dependent STM imaging of the kagome layer on the K-terminated FeSn/SrTiO<sub>3</sub>(111) film. Setpoint:  $I = 5.0$  nA with  $V$  specified.**

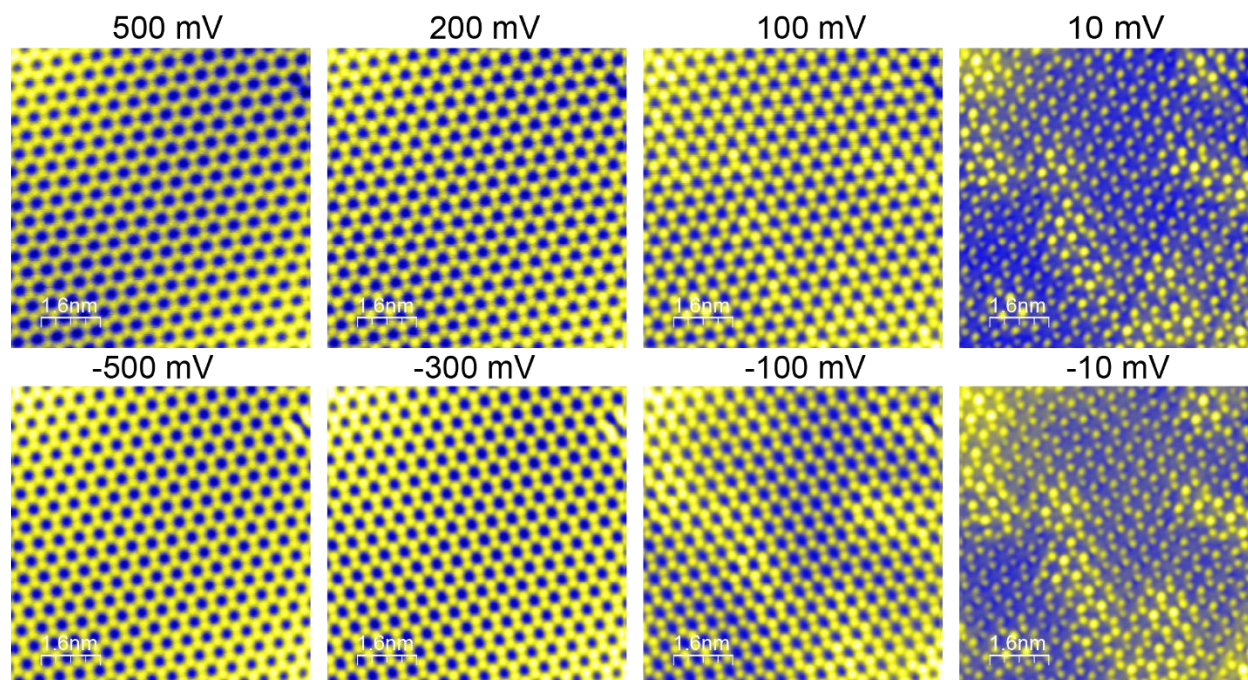

**Figure S6. Bias-dependent STM imaging of the Sn honeycomb on the Sn terminated FeSn/SrTiO<sub>3</sub>(111) film.** Setpoint:  $I = 5.0$  nA with  $V$  specified. The defect states are revealed at -10 and 10 mV.

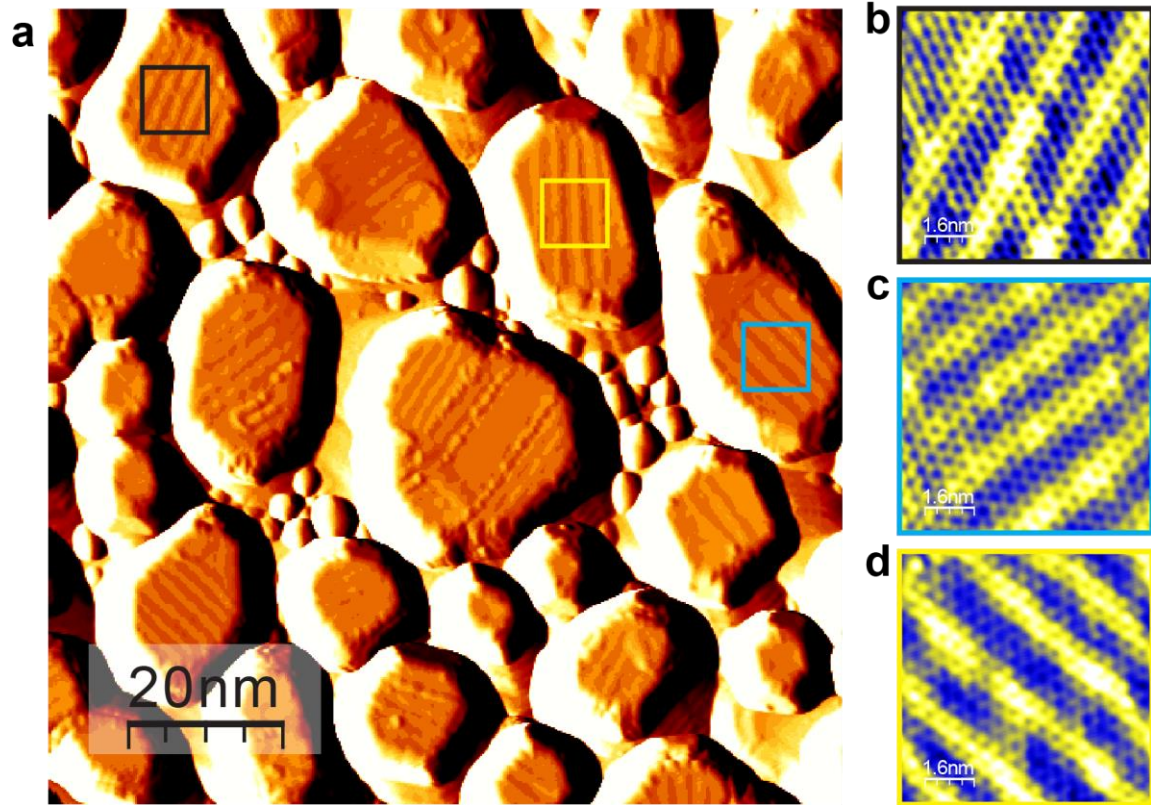

**Figure S7. Stripe modulations on Sn terminated FeSn/SrTiO<sub>3</sub>(111) films.** **a**, STM image of a FeSn film grown on SrTiO<sub>3</sub>(111) substrate in differential mode, setpoint:  $V = 1.0$  V,  $I = 100$  pA. **b-d**, STM images of the stripe modulations taken in the regions outlined by black, cyan, and yellow squares in (a). Setpoint:  $V = 3.0$  mV,  $I = 5.0$  nA.

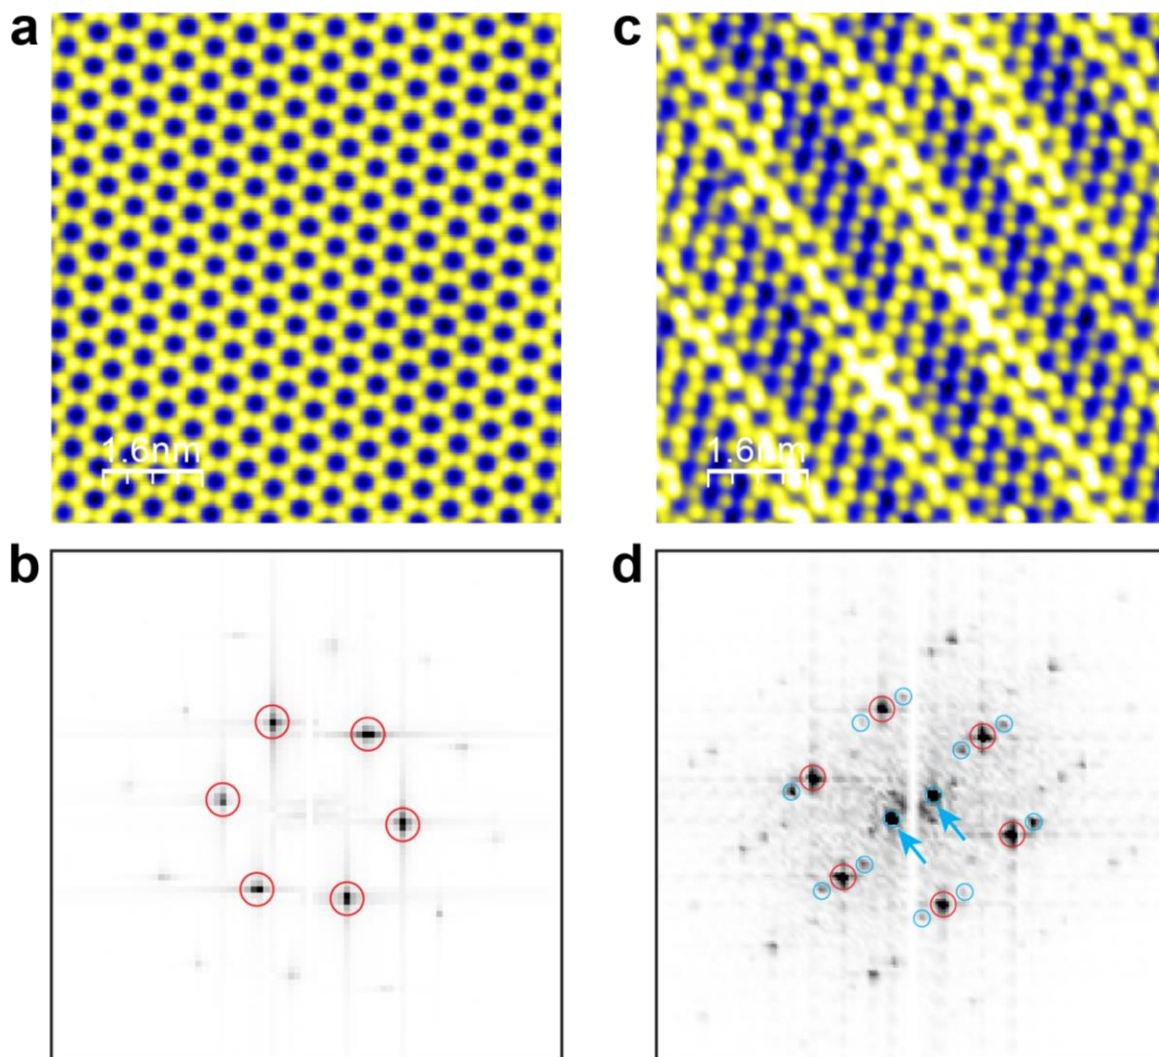

**Figure S8. FFT of perfect and deformed honeycomb lattices.** **a**, Atomically resolved STM image of the deformed honeycomb lattice, setpoint:  $V = 100$  mV,  $I = 5.0$  nA. **b**, FFT of **(a)** with Bragg peaks  $Q_1$ ,  $Q_2$  and  $Q_3$  marked in red circles. The  $Q_4$  in cyan circle denotes the stripe modulation. **c**, Atomic resolution image of a perfect honeycomb lattice, setpoint:  $V = -2.0$  mV,  $I = 5.0$  nA. **d**, FFT of **(c)**. The red circles mark the Bragg peak  $Q$ .

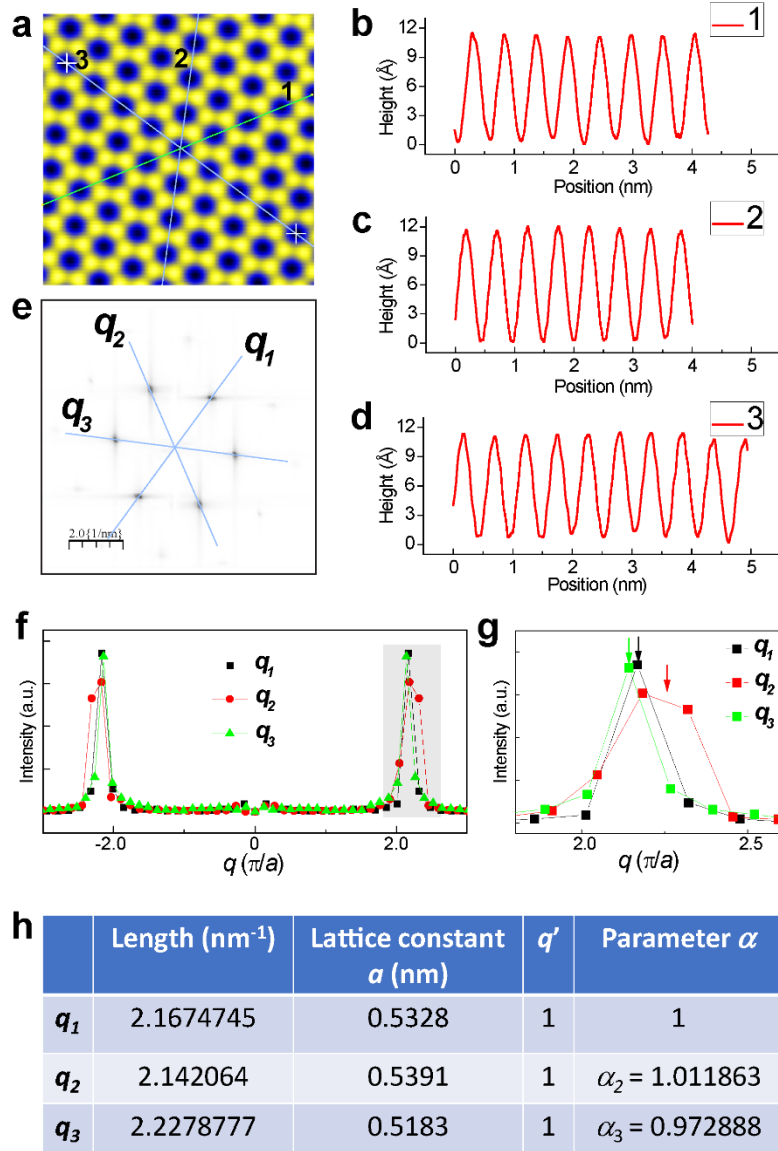

**Figure S9. Calibration of lattice distortion caused by nonlinearity of the STM scanner.** **a**, Atomic resolution image of honeycomb lattice, setpoint:  $V = -2.0$  mV,  $I = 5.0$  nA. **b-d**, Line profiles across the lines marked as 1, 2 and 3 in **(a)**. **e**, FFT of **(a)**. **f**, Line profiles along  $q_1$ ,  $q_2$  and  $q_3$  directions marked in **(e)**. **g**, Zoom-in of the shaded region in **(f)**. **h**, Calibration of lattice constant by the formula  $q' = \alpha * q$ , where  $q'$  represents the calibrated vector, and  $q$  represents the measured lattice constants along three directions from STM imaging.

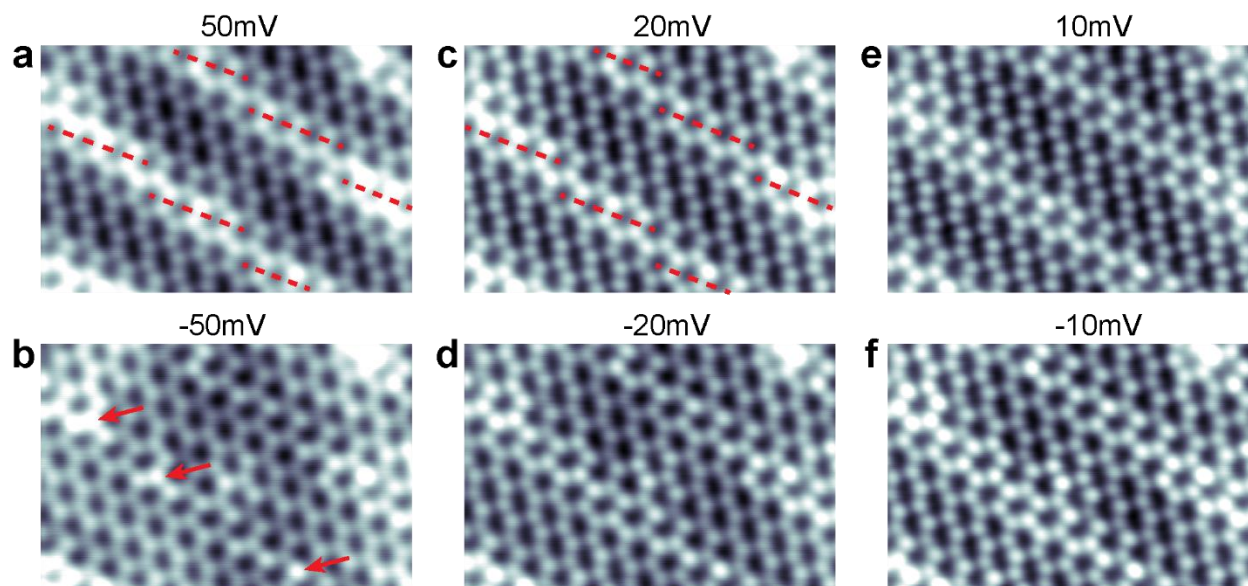

**Figure S10. Bias-dependent STM imaging of distorted honeycomb lattice.** The red dashed lines in (a) and (b) indicates the interlaced structure of the stripes. Setpoint:  $I = 1.0$  nA with bias  $V$  specified. Size of the image:  $4.0$  nm  $\times$   $6.0$  nm. The red arrows in (b) mark the kink points of the stripes that display a higher contrast under  $V = -50$  mV.

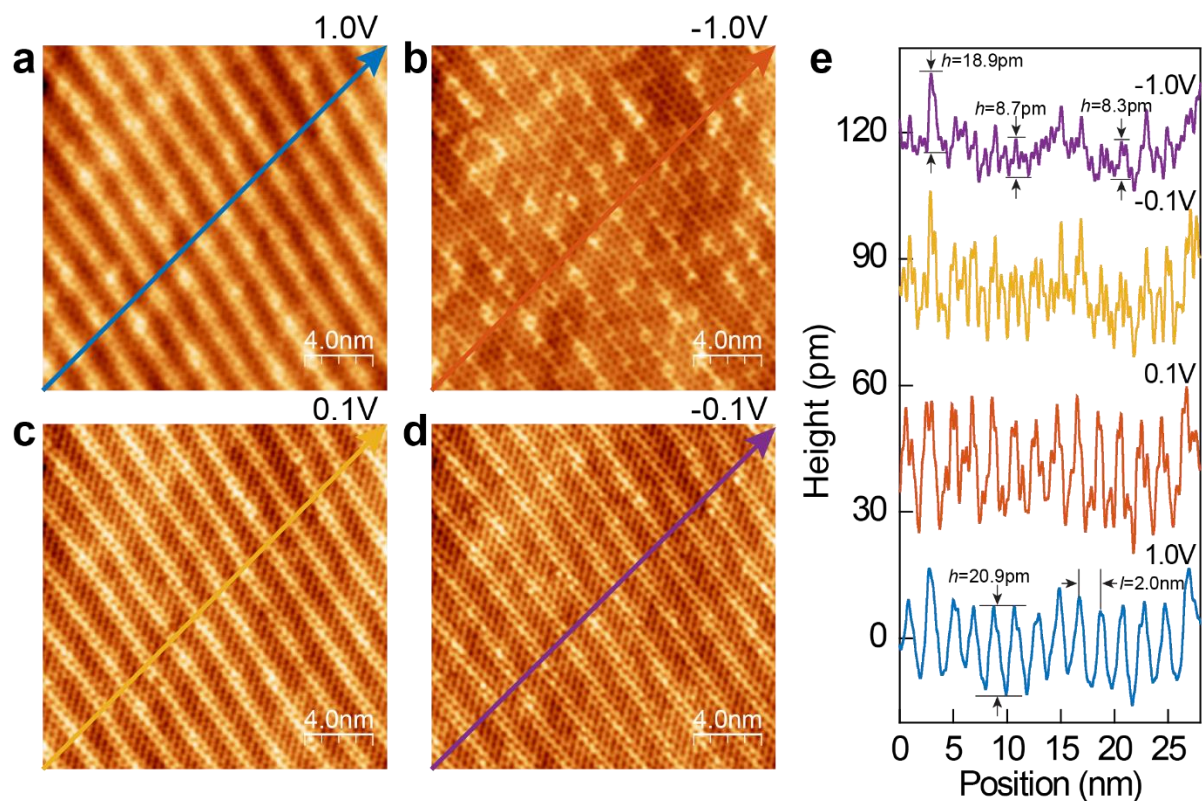

**Figure S11. Bias-dependence of stripe modulations.** **a-d**, Topographic STM images of stripe modulations under different bias  $V$ . Setpoint:  $I = 5.0$  nA with  $V$  specified. **e**, Line profile across the topographic image under different bias  $V$  with the direction marked by arrows in **(a-d)**. The high and low contrast under  $V = 1.0$  V contributes to  $h = 20.9$  pm and the periodicity cross the stripes is determined to be  $l = 2.0$  nm.

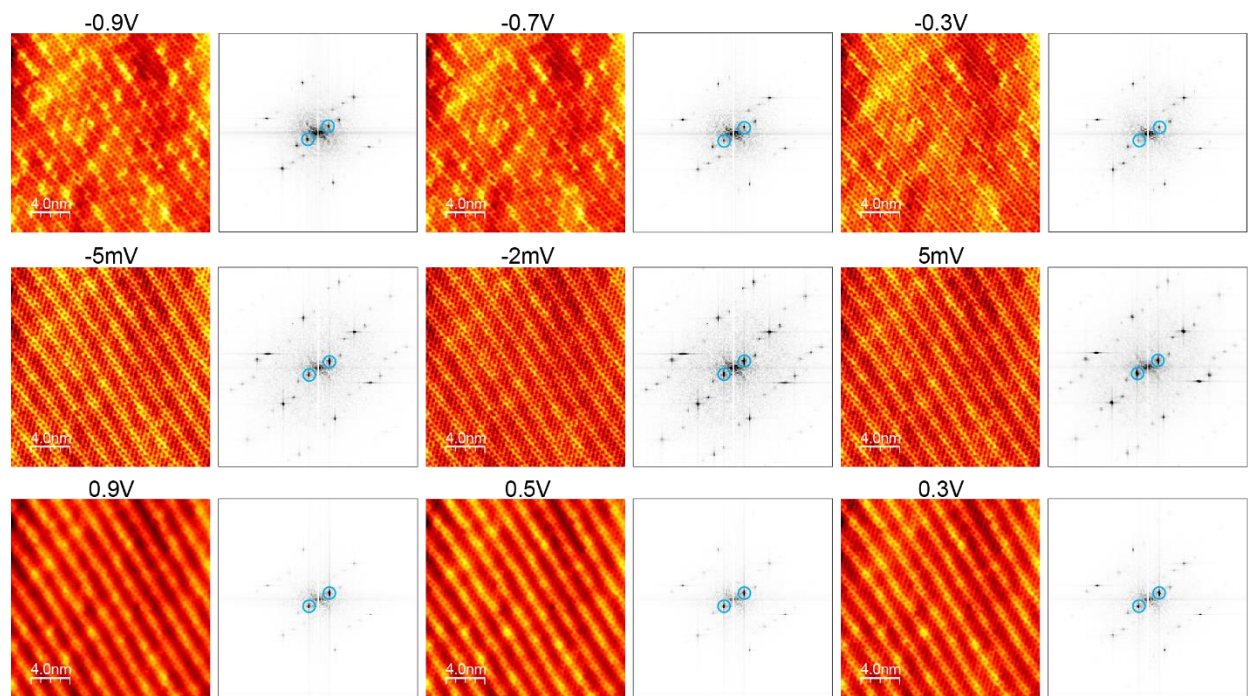

**Figure S12. FFT of bias-dependent STM images.** The STM images are taken with a tunneling current  $I = 5.0$  nA with  $V$  specified. The diffraction peaks of the stripes are denoted by a pair of cyan circles in FFTs.



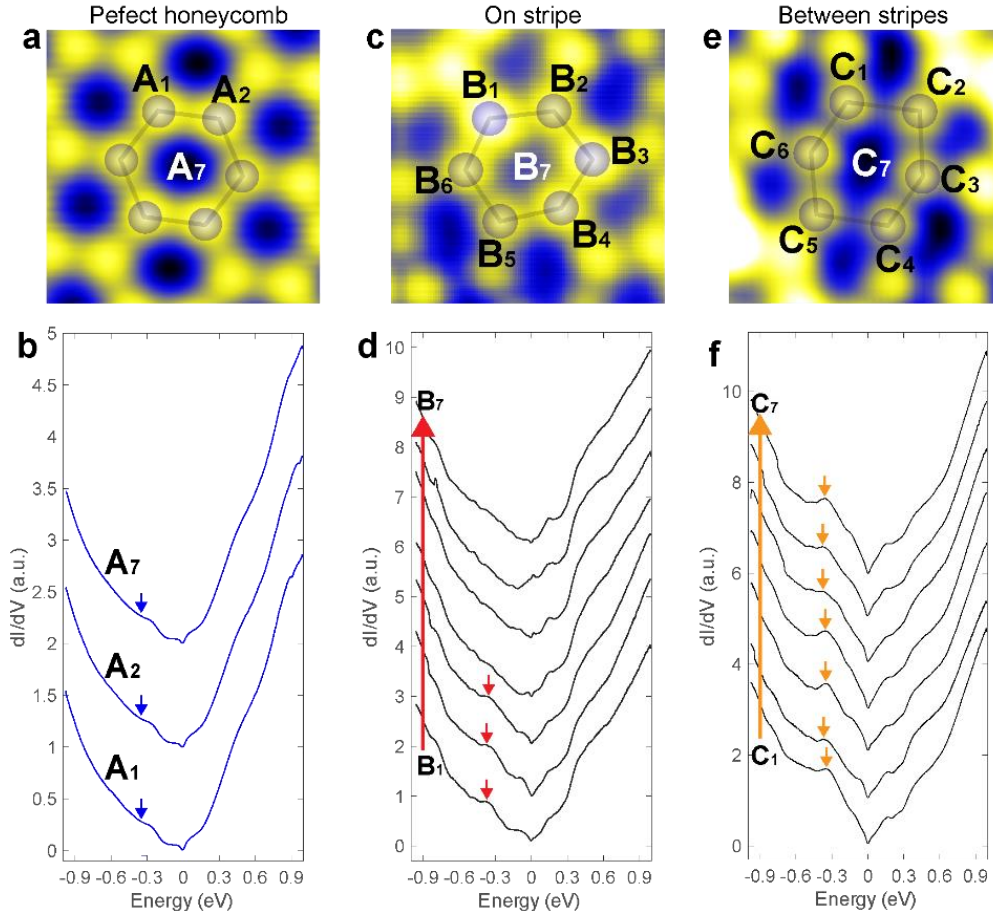

**Figure S13. Site-dependent  $dI/dV$  spectra within one honeycomb lattice.** **a**, Atomic resolution image showing perfect honeycomb lattice taken on the surface without stripe modulation, setpoint:  $V = -2.0$  mV,  $I = 5.0$  nA. **b**,  $dI/dV$  spectra at three typical sites, as labeled  $A_1$ ,  $A_2$  and  $A_7$  in (a). The blue arrows denote the dip feature associated with the Dirac point  $E_D$ . **c**, STM image of the slightly deformed honeycomb on the stripe, setpoint:  $V = 10$  mV,  $I = 1.0$  nA. **d**,  $dI/dV$  spectra taken at sites labeled in (c). **e**, STM image of the strongly deformed honeycomb between the stripes, setpoint:  $V = 10$  mV,  $I = 1.0$  nA. **f**,  $dI/dV$  spectra taken at different sites labeled in (e). Typical sites of slightly and strongly deformed honeycomb lattice are labeled as  $B_1$  to  $B_7$  and  $C_1$  to  $C_7$ , respectively.

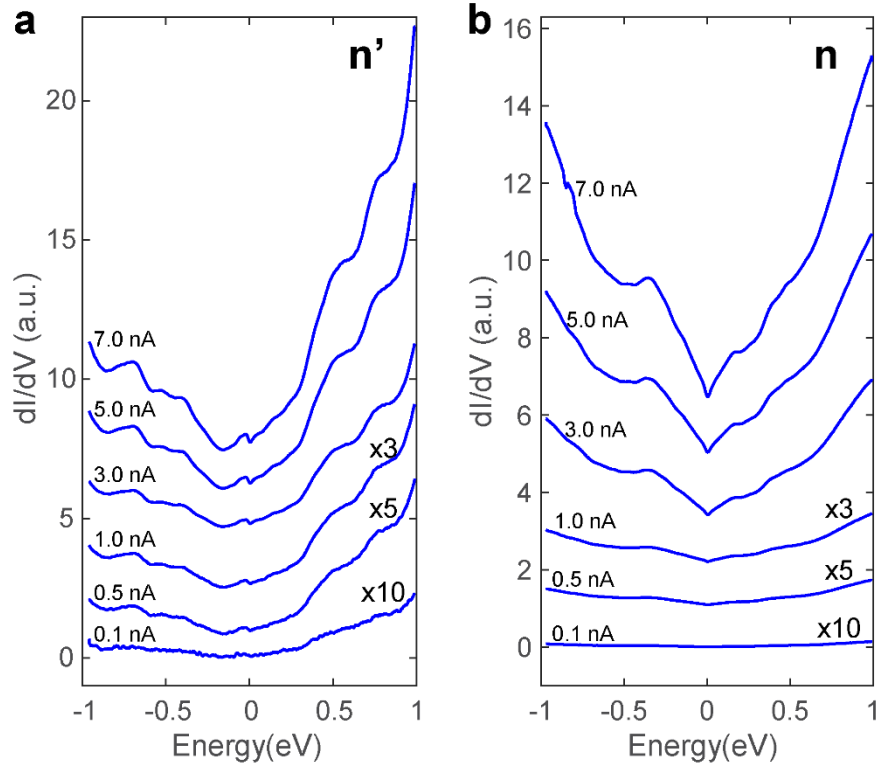

**Figure S14. Setpoint-dependent of  $dI/dV$  spectra on stripe ( $n'$ ) and between stripes ( $n$ ).** Setpoint:  $V = 1.0$  V, with tunneling current  $I$  specified. Spectra are vertically offset for clarity. The intensity of the  $dI/dV$  spectra taken at  $I = 1.0, 0.5$  and  $0.1$  nA are multiplied  $3\times, 5\times$  and  $10\times$ , respectively.

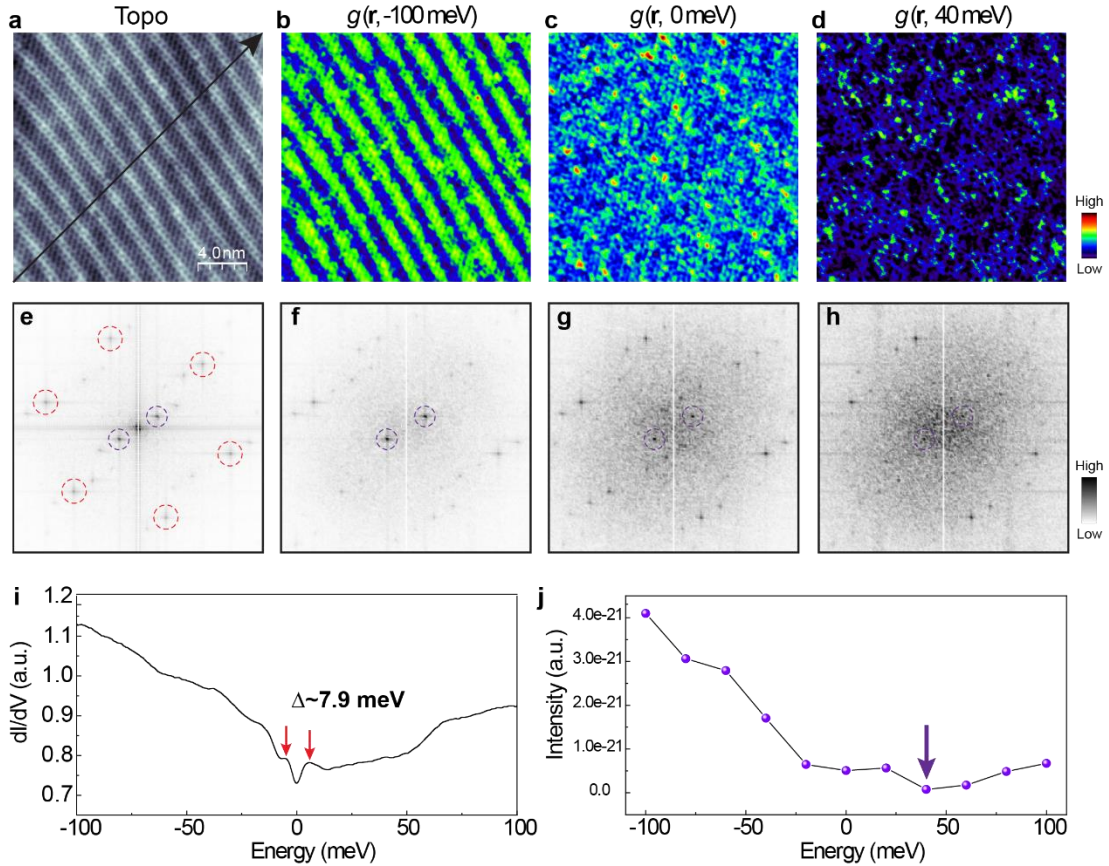

**Figure S15. FFT analysis of the stripe modulations.** **a**, Topographic STM image showing periodic stripe modulations. Setpoint:  $V = 100$  mV,  $I = 5.0$  nA. **b-d**,  $dI/dV$  maps of the region **a**. Setpoint:  $V = 100$  mV,  $I = 5.0$  nA,  $V_{mod} = 2$  meV. **e-h**, FFTs of **a-d**, respectively. The dashed red circles in **e** mark the Bragg lattice. The pair of dashed purple circles in **e-h** mark the stripe feature. **i**,  $dI/dV$  maps in the energy range  $[-100$  meV,  $100$  meV]. The red arrows denote a gap feature  $\Delta \sim 7.9$  meV at Fermi level. **j**, The intensity of the diffraction peak for the stripe modulation in FFTs as function of energy, where the minimal is located at 40 meV above the  $E_F$ .

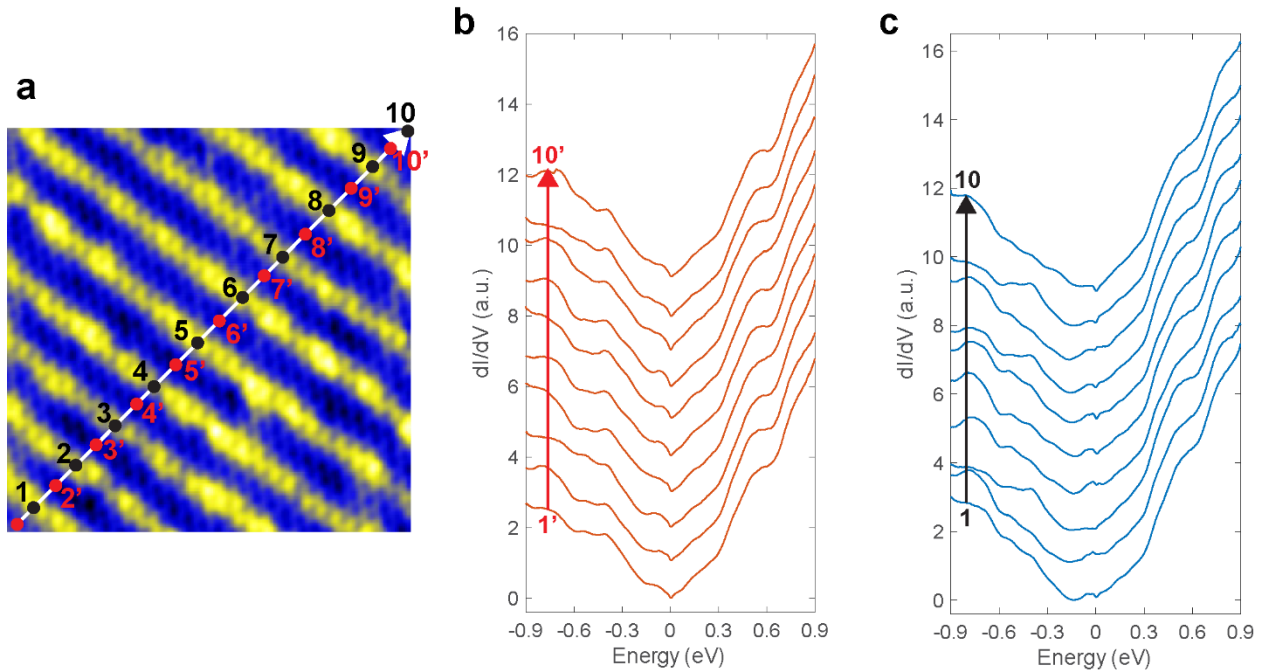

**Figure S16. Periodic stripe modulations.** **a**, Atomic resolution image of stripe modulations. Setpoint:  $V = 1.0$  V,  $I = 7.0$  nA. 1-10 label sites at the bright pattern (honeycomb lattice) and 1' to 10' label the sites between stripe patterns (deformed honeycomb lattice). **b**, dI/dV spectra at deformed honeycomb lattice, as labeled 1' to 10' in (a). **c**, dI/dV spectra at honeycomb lattice, as labeled 1 to 10 in (a).

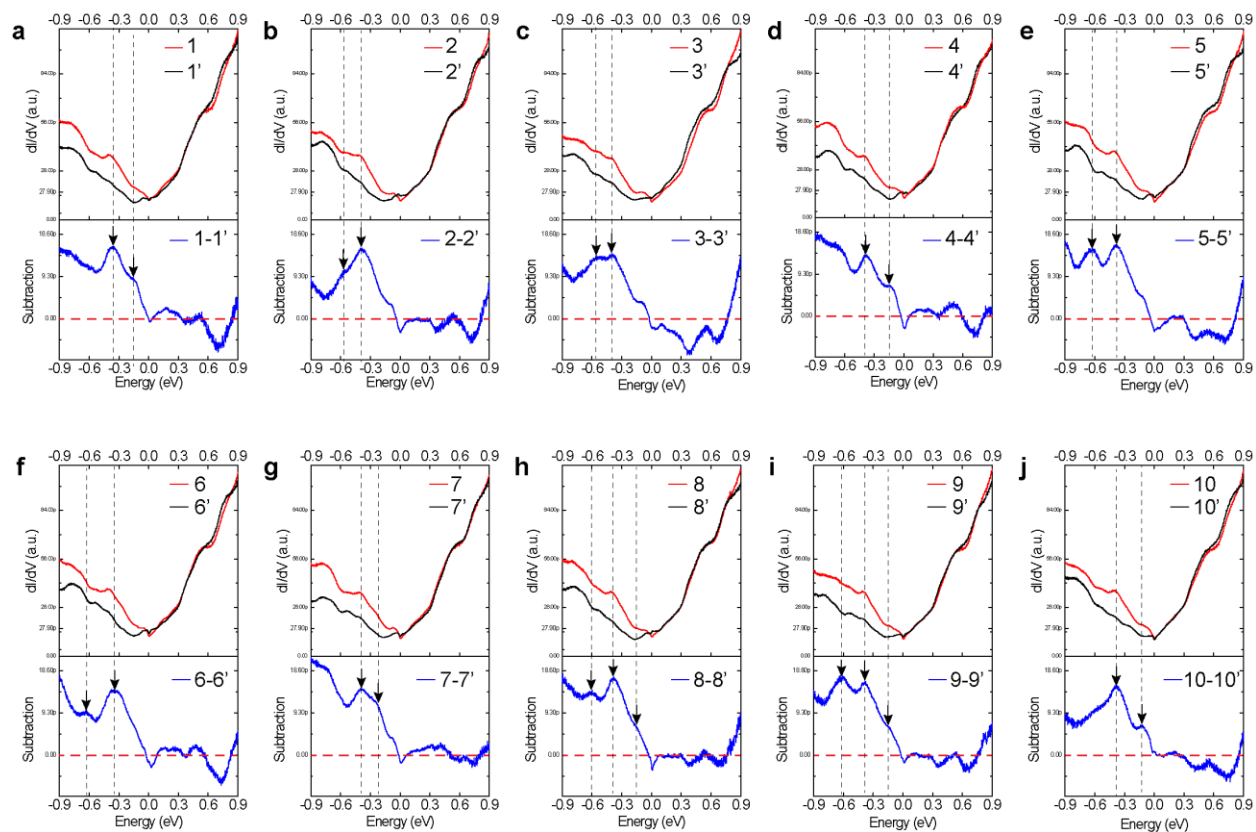

**Figure S17. Subtraction of 10 sets of  $dI/dV$  spectra to reveal the Landau levels.** a-j,  $dI/dV$  spectra taken between the stripes (labeled as  $n$ ) subtracted by that taken on the stripe (labeled by  $n'$ ). The black arrows and dashed lines mark the Landau levels.

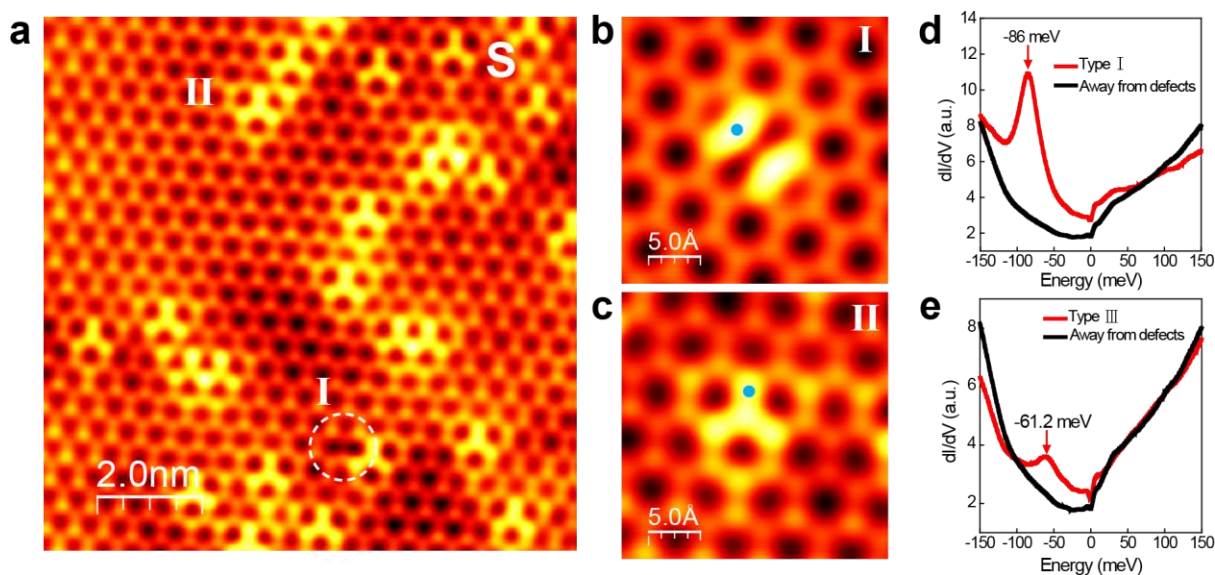

**Figure S18. Bound states associated with two types of defects on the Sn-terminated FeSn/STO(111) film.** Two types of defects commonly observed on the Sn-terminated surface. **a**, Atomic resolution image of the Sn-termination (S) with a honeycomb lattice with three-fold and two-fold symmetrical defects (dashed white circle). Setpoint:  $V = 0.2$  V,  $I = 3.0$  nA. **b**, STM imaging showing bound states of the Sn di-vacancy, setpoint:  $V = 2.0$  V,  $I = 10$  pA. **c**, STM imaging showing bound states of the substitutional defect, setpoint:  $V = 2.0$  V,  $I = 10$  pA. **d-e**,  $dI/dV$  spectra measured at the cyan dots in **b** and **c**, respectively.

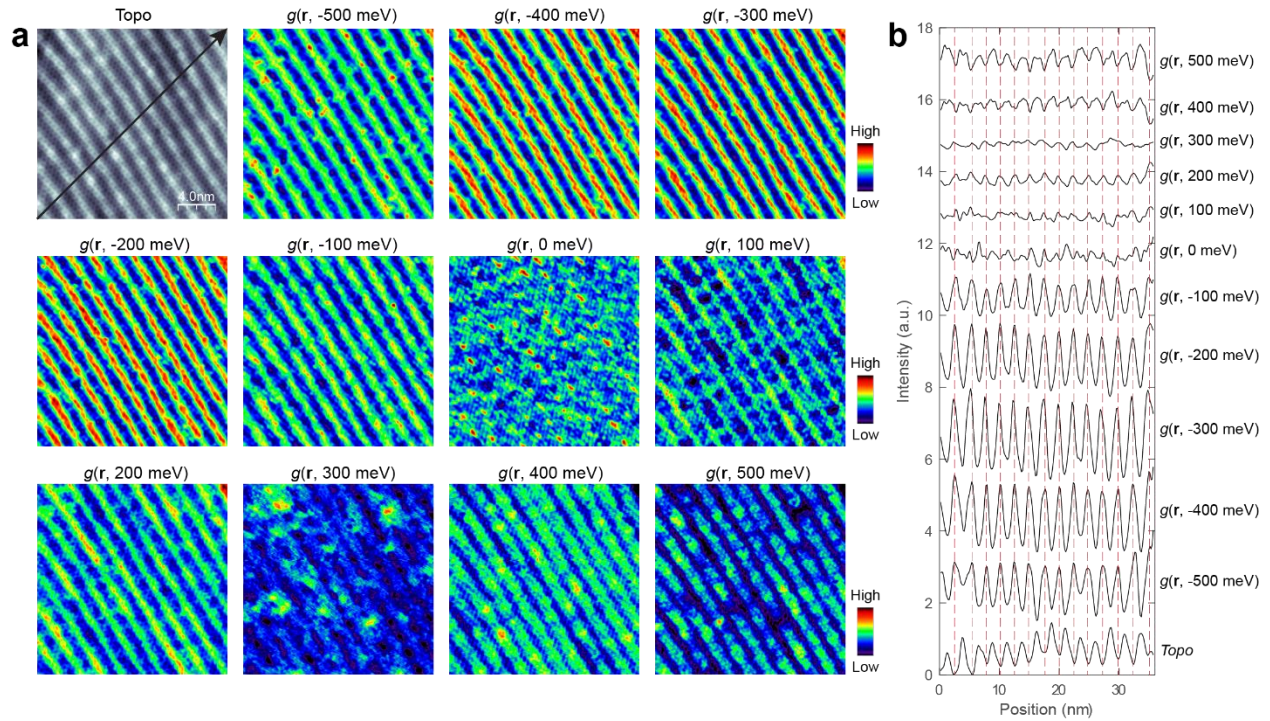

**Figure S19. Spatial-resolved  $dI/dV$  maps.** **a**, Topographic STM image showing periodic stripe modulations. Setpoint:  $V = 500 \text{ mV}$ ,  $I = 5.0 \text{ nA}$ . **b**, Line profiles along the black arrow in **(a)** and the energy-dependent  $dI/dV$  maps. The dashed red lines mark the valley position from topography. Between the energy ranges  $[-500 \text{ meV}, -100 \text{ meV}]$  and  $[100 \text{ meV}, 300 \text{ meV}]$ , the valley position in the topography corresponds to higher density of states. At Fermi level  $g(r, 0 \text{ meV})$ , the modulation is almost gone. At the energy window  $[400 \text{ meV}, 500 \text{ meV}]$ , the valley position in the topography corresponds to lower density of states. There is a  $\pi$ -phase shift between the energy ranges of  $[400 \text{ meV}, 500 \text{ meV}]$  with the other energies. Setpoint:  $V = 500 \text{ mV}$ ,  $I = 5.0 \text{ nA}$ ,  $V_{mod} = 10 \text{ mV}$ .

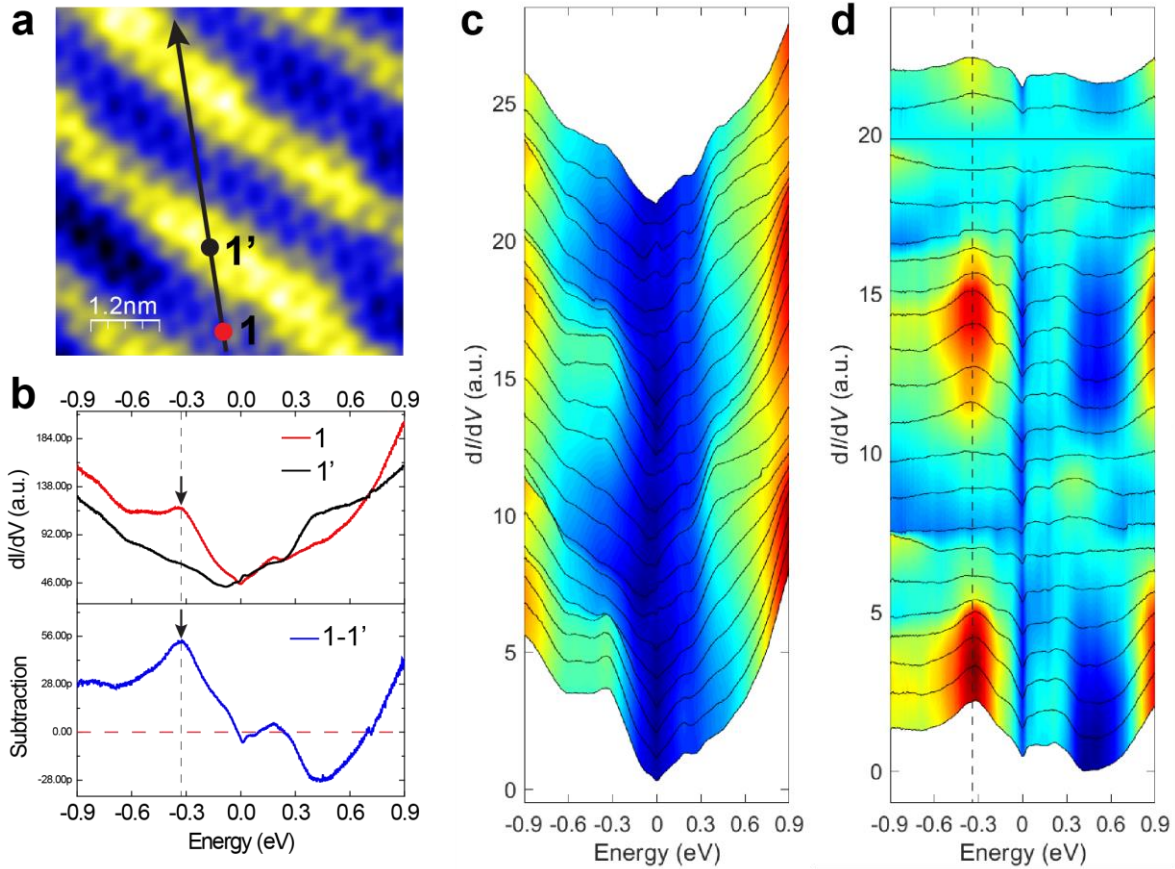

**Figure S20. Another example of Landau levels by pseudo-magnetic field.** **a**, Topographic STM image revealing stripes. Setpoint:  $V = 0.5$  V,  $I = 6.0$  nA. **b**,  $dI/dV$  spectra taken at the red and black dots (upper panel) and their difference spectrum (lower panel). **c**, A series of  $dI/dV$  spectra taken along the black arrow in (a). The peak marked by the black arrow is assigned to the  $0^{\text{th}}$  Landau level. **d**, The  $dI/dV$  spectra in (c) subtracted by the  $dI/dV$  spectrum taken on the stripe. The dashed line clearly reveals the  $0^{\text{th}}$  Landau level which appears between the stripes and is absent on the stripe.



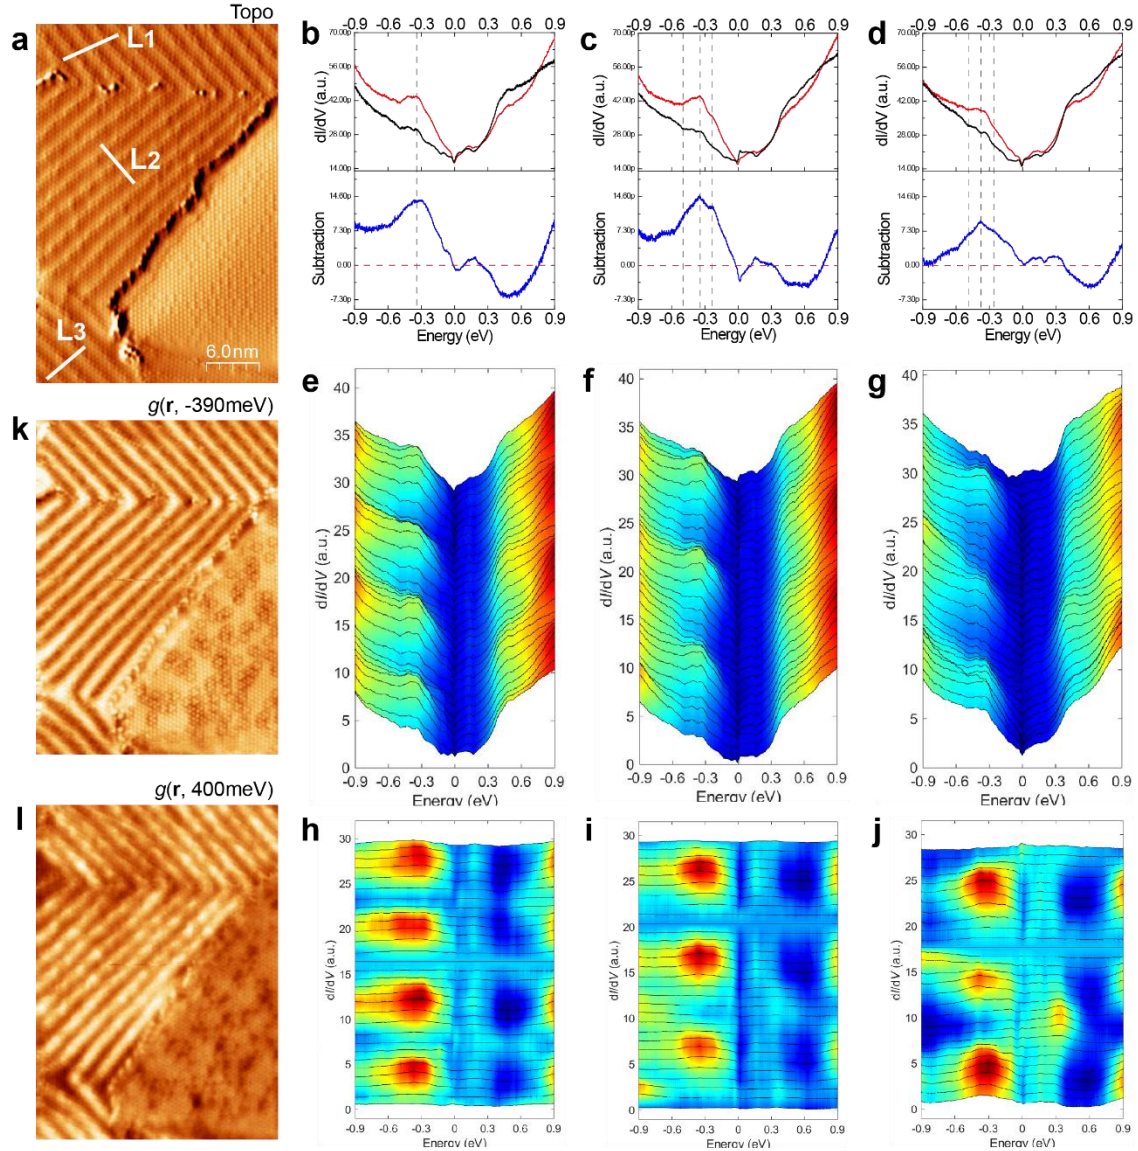

**Figure S21. Landau levels independent on the stripe orientations.** **a**, Topographic STM images revealing the stripes with different orientations. Setpoint:  $V = 0.2$  V,  $I = 7.0$  nA. **b-d**,  $dI/dV$  spectra taken on the stripes (red curves) and the region between the stripes (black curve) for the line L1, L2 and L3, respectively. **e-g**, Line  $dI/dV$  spectra taken along the line L1, L2 and L3, respectively. **h-j**, A series of  $dI/dV$  spectra subtracted by the spectra taken between the stripes. **k-l**,  $dI/dV$  map at the energy of  $-390$  meV and  $400$  meV. The contrast of the stripes reverses between the two energies.

## REFERENCES

- (1) Ilan, R.; Grushin, A. G.; Pikulin, D. I. Pseudo-Electromagnetic Fields in 3D Topological Semimetals. *Nat. Rev. Phys.* **2020**, *2* (1), 29–41. <https://doi.org/10.1038/s42254-019-0121-8>.
- (2) Vozmediano, M. A. H.; Katsnelson, M. I.; Guinea, F. Gauge Fields in Graphene. *Phys. Rep.* **2010**, *496* (4), 109–148. <https://doi.org/10.1016/j.physrep.2010.07.003>.
- (3) Novoselov, K. S.; Geim, A. K.; Morozov, S. V.; Jiang, D.; Katsnelson, M. I.; Grigorieva, I. V.; Dubonos, S. V.; Firsov, A. A. Two-Dimensional Gas of Massless Dirac Fermions in Graphene. *Nature* **2005**, *438* (7065), 197–200. <https://doi.org/10.1038/nature04233>.
- (4) Zhang, Y.; Tan, Y.-W.; Stormer, H. L.; Kim, P. Experimental Observation of the Quantum Hall Effect and Berry's Phase in Graphene. *Nature* **2005**, *438* (7065), 201–204. <https://doi.org/10.1038/nature04235>.
- (5) Xu, Y.; Yan, B.; Zhang, H.-J.; Wang, J.; Xu, G.; Tang, P.; Duan, W.; Zhang, S.-C. Large-Gap Quantum Spin Hall Insulators in Tin Films. *Phys. Rev. Lett.* **2013**, *111* (13), 136804. <https://doi.org/10.1103/PhysRevLett.111.136804>.
- (6) Deng, J.; Xia, B.; Ma, X.; Chen, H.; Shan, H.; Zhai, X.; Li, B.; Zhao, A.; Xu, Y.; Duan, W.; Zhang, S.-C.; Wang, B.; Hou, J. G. Epitaxial Growth of Ultraflat Stanene with Topological Band Inversion. *Nat. Mater.* **2018**, *1*. <https://doi.org/10.1038/s41563-018-0203-5>.
- (7) Gou, J.; Kong, L.; Li, H.; Zhong, Q.; Li, W.; Cheng, P.; Chen, L.; Wu, K. Strain-Induced Band Engineering in Monolayer Stanene on Sb(111). *Phys. Rev. Mater.* **2017**, *1* (5), 054004. <https://doi.org/10.1103/PhysRevMaterials.1.054004>.
- (8) Liu, T. Strain-Induced Pseudomagnetic Field and Quantum Oscillations in Kagome Crystals. *Phys. Rev. B* **2020**, *102* (4), 045151. <https://doi.org/10.1103/PhysRevB.102.045151>.
